# Supplementary material for: A randomised experiment of health, cost and social norm message frames to encourage acceptance of swaps in a simulation online supermarket
Source: PLOS journal article supplement (doi:10.1371/journal.pone.0246455), 2021-02-17
Supplement: S2 (10.1371/journal.pone.0246455.s002) [file journal.pone.0246455.s002]

## Consent

**Make sure you have 40 minutes available before starting the task. This is how long the task will take, and it should be completed in one go.**

This survey is a research project being run by scientists within the University of Cambridge and from Public Health England ([Study Information Sheet](#)). If you have any questions please contact the researcher.

In summary you will be asked to:

- answer a few simple questions about you. No questions ask your name or other personal information.
- have a paper and pen handy to make a note of a shopping list.
- complete a food shopping exercise using our supermarket website.
- answer a few more questions about the shopping exercise

**Give your consent to take part by confirming you understand the following:**

- ☐ 1. I have read the Information for Participants and have had the opportunity to ask questions.
- 2. My participation is totally voluntary. I am free to withdraw at any time without having to give a reason.
- 3. All personal information will remain confidential to ensure I cannot be identified.
- 4. My data will be stored anonymously and securely, and may be used for future research.
- 5. I agree to take part in the Food Choices Study.
- ☐ OR I do NOT agree to take part in this research study. Selecting this option will return me to the panel website

## Quality warning

## Important – data quality!

Data quality is of the utmost importance for this survey. Please be aware that there are simple test questions in the survey that check whether you are reading the questions carefully. If you answer one of these test questions incorrectly, you will fail the quality control and will not proceed with the study.

- ☐ OK. I will read the questions carefully and am happy to proceed with the study.

## Personal Info 1

### Browser Meta Info

*This question will not be displayed to the recipient.*

Browser: **Firefox**

Version: **40.0**

Operating System: **Windows NT 6.1**

Screen Resolution: **1920x1080**

Flash Version: **18.0.0**

Java Support: **1**

User Agent: **Mozilla/5.0 (Windows NT 6.1; WOW64; rv:40.0) Gecko/20100101 Firefox/40.0**

**Thinking about food shopping, which of these best describes the level of responsibility you have for the shopping in your household?**

- ☐ Responsible for all or most of the food/grocery shopping
- ☐ Responsible for about half of the food/grocery shopping
- ☐ Responsible for less than half of the food/grocery shopping
- ☐ Not responsible for any of the food/grocery shopping

**Do you sleep more than an hour (60 minutes) in total per night?**

- |                       |                       |                       |                       |                       |                       |                       |
|-----------------------|-----------------------|-----------------------|-----------------------|-----------------------|-----------------------|-----------------------|
| 1                     |                       |                       |                       |                       |                       | 7                     |
| (Never)               | 2                     | 3                     | 4                     | 5                     | 6                     | (Always)              |
| <input type="radio"/> | <input type="radio"/> | <input type="radio"/> | <input type="radio"/> | <input type="radio"/> | <input type="radio"/> | <input type="radio"/> |

**How often on average over the past year have you bought each of the following shopping list items for you or your household?**

|                                                                | Never<br>or not in<br>the last<br>year | 1-3<br>times in<br>the last<br>year | 4-11<br>times in<br>the last<br>year | 1-3<br>times a<br>month | Once a<br>week        | 2-4<br>times a<br>week | 5 or<br>more<br>times a<br>week |
|----------------------------------------------------------------|----------------------------------------|-------------------------------------|--------------------------------------|-------------------------|-----------------------|------------------------|---------------------------------|
| - A loaf of bread                                              | <input type="radio"/>                  | <input type="radio"/>               | <input type="radio"/>                | <input type="radio"/>   | <input type="radio"/> | <input type="radio"/>  | <input type="radio"/>           |
| - Soup for a light meal                                        | <input type="radio"/>                  | <input type="radio"/>               | <input type="radio"/>                | <input type="radio"/>   | <input type="radio"/> | <input type="radio"/>  | <input type="radio"/>           |
| - Ready-to-eat meat or fish, or a packet of cheese             | <input type="radio"/>                  | <input type="radio"/>               | <input type="radio"/>                | <input type="radio"/>   | <input type="radio"/> | <input type="radio"/>  | <input type="radio"/>           |
| - Sweet biscuits                                               | <input type="radio"/>                  | <input type="radio"/>               | <input type="radio"/>                | <input type="radio"/>   | <input type="radio"/> | <input type="radio"/>  | <input type="radio"/>           |
| - Crisps or savoury snacks                                     | <input type="radio"/>                  | <input type="radio"/>               | <input type="radio"/>                | <input type="radio"/>   | <input type="radio"/> | <input type="radio"/>  | <input type="radio"/>           |
| - Chilled dairy desserts                                       | <input type="radio"/>                  | <input type="radio"/>               | <input type="radio"/>                | <input type="radio"/>   | <input type="radio"/> | <input type="radio"/>  | <input type="radio"/>           |
| - Meat or fish for a roast lunch or a vegetarian alternative   | <input type="radio"/>                  | <input type="radio"/>               | <input type="radio"/>                | <input type="radio"/>   | <input type="radio"/> | <input type="radio"/>  | <input type="radio"/>           |
| - A pack of pasta/rice/couscous /polenta or other starchy food | <input type="radio"/>                  | <input type="radio"/>               | <input type="radio"/>                | <input type="radio"/>   | <input type="radio"/> | <input type="radio"/>  | <input type="radio"/>           |
| - A side dish to have with a main meal                         | <input type="radio"/>                  | <input type="radio"/>               | <input type="radio"/>                | <input type="radio"/>   | <input type="radio"/> | <input type="radio"/>  | <input type="radio"/>           |
| - A snack to have between meals                                | <input type="radio"/>                  | <input type="radio"/>               | <input type="radio"/>                | <input type="radio"/>   | <input type="radio"/> | <input type="radio"/>  | <input type="radio"/>           |
| - A sandwich filling                                           | <input type="radio"/>                  | <input type="radio"/>               | <input type="radio"/>                | <input type="radio"/>   | <input type="radio"/> | <input type="radio"/>  | <input type="radio"/>           |
| - A treat for you to eat straight away                         | <input type="radio"/>                  | <input type="radio"/>               | <input type="radio"/>                | <input type="radio"/>   | <input type="radio"/> | <input type="radio"/>  | <input type="radio"/>           |

**How often have you been to every country in the world (all 196 of them).**

☐ Never
 ☐ Not in the past year
 ☐ 1-3 times a year
 ☐ 4-11 times a year
 ☐ 1-3 times a month
 ☐ Once a week
 ☐ More than once a week.

**Your gender**

- ☐ Male  
☐ Female

**Your age (years)**

**What is the highest education qualification you have achieved?**

- ☐ None
- ☐ Up to 4 GCSE's (Including 1-4 O Levels/CSE/GCSEs (any grades), Foundation Diploma, NVQ level 1, Foundation GNVQ or equivalents)
- ☐ 5 or more GCSE's or 1 A-level (Including 5+ GCSEs (Grades A\*-C), 1 A Level/ 2-3 AS Levels, NVQ level 2, Intermediate GNVQ, City and Guilds Craft, BTEC First/General Diploma, RSA Diploma, Apprenticeship or equivalents)
- ☐ 2 or more A-levels (Including 2+ A Levels, 4+ AS Levels, NVQ Level 3, Advanced GNVQ, City and Guilds Advanced Craft, ONC, OND, BTEC National, RSA Advanced Diploma or equivalents)
- ☐ Bachelor's degree (Including BA, BSc, NVQ Level 4-5, HNC, HND, RSA Higher Diploma, BTEC Higher level or equivalents)
- ☐ Post-Graduate degree or qualification (Including Higher Degrees e.g. MA, PhD, PGCE, Professional qualifications e.g. teaching, nursing, accountancy or equivalents)

**Shopping task**

**You are now going to complete a food shopping exercise using an online supermarket website. This is not a real commercial site, and you will not be asked to spend your own money or enter any personal details.**

**Have a pen and paper ready. You will need to make a note of your shopping list.**

**Click Next when you are ready.**

**Thank you for completing the shopping task.**

**How did you get on?**

**If you managed to buy everything on the list, please click '>>' below to finish the survey.**

**If you didn't quite follow the list, please have another go at the shopping task. Make a note of the list again and click on the link below. You will return to the supermarket to start again (your basket will be empty). We will use the data from your shopping task that follows the list the closest.**

**Imagine you are about do a real shopping task using your own money. Please can you 'buy' all the foods listed below using our online supermarket website. When you have chosen all the items on the list, check-out from the supermarket to bring you back to this survey and finish the study.**

**Please choose foods you would actually buy for you or your household. The budget is a guideline amount – you do not need to spend it all, but please try to stay within it.**

**Please now write down the list to make sure you get everything. Then click the link to the supermarket.**

**Your budget: £25**

**Your shopping list:**

- A loaf of bread (approx 800g)
- Soup for a light meal for one
- A packet of ready-to-eat meat or fish, or a packet of cheese.
- A pack of sweet biscuits
- Crisps or savoury snacks for 6 people
- A chilled dairy-based dessert for 6 people
- Meat/ fish/ vegetarian alternative for a roast lunch (approx. 500g)
- 500g pack of pasta or rice or couscous or polenta or other starchy food
- A side dish to have with a main meal
- A snack to have between meals
- A sandwich filling
- A treat for you to eat straight away.

**Click below to access the supermarket and select all the items on the list. Remember to checkout when you have finished to return to this page.**

**[Visit the Supermarket website](#)**

**Post study questions**

**Overall, how would you rate your shopping experience using Woods, our online supermarket website?**

- ☐ Excellent
- ☐ Very Good
- ☐ Good
- ☐ Fair
- ☐ Poor

**The online supermarket you have just used offered you alternative foods to some of the foods you originally chose. Is this something that you would like to have when you do your usual shopping?**

- ☐ Very strongly like
- ☐ Strongly like
- ☐ Somewhat like
- ☐ Indifferent
- ☐ Somewhat dislike
- ☐ Strongly dislike
- ☐ Very strongly dislike
- ☐ I didn't notice any alternatives being offered to me.

**How often, on average over the past year, have you..**

|                                                                                                                   | Never<br>or not<br>in the<br>last<br>year | 1-3<br>times<br>in the<br>last<br>year | 4-11<br>times<br>in the<br>last<br>year | 1-3<br>times a<br>month | At<br>least<br>once a<br>week |
|-------------------------------------------------------------------------------------------------------------------|-------------------------------------------|----------------------------------------|-----------------------------------------|-------------------------|-------------------------------|
| ... shopped online for food or groceries to be delivered to you (e.g. Tesco.com, Ocado.com, mysupermarket.co.uk)? | <input type="radio"/>                     | <input type="radio"/>                  | <input type="radio"/>                   | <input type="radio"/>   | <input type="radio"/>         |
| ... shopped online for non-food items to be delivered to you (e.g. books, clothes, electronics)?                  | <input type="radio"/>                     | <input type="radio"/>                  | <input type="radio"/>                   | <input type="radio"/>   | <input type="radio"/>         |

**What units do you prefer to use to tell us your weight and height?**

|        | Metric (kg, m, cm)    | Imperial (stone, lb, feet, inches) |
|--------|-----------------------|------------------------------------|
| Weight | <input type="radio"/> | <input type="radio"/>              |
| Height | <input type="radio"/> | <input type="radio"/>              |

**Your height (metric):**

Centimeters

**Your height (imperial):**

Feet

Inches

**Your weight (metric):**

kg

**Your weight (imperial):**

stone

lb

**What is your total household income per year before tax (also known as gross per annum salary)**

- ☐ Less than £15,500
- ☐ Between £15,500 and £24,999
- ☐ Between £25,000 and £39,999
- ☐ More than £40,000

**You have now completed the study.**

**Many thanks for taking part.**

**Clicking 'next' will take you back to the recruitment agency website.**

**Please tell us if you have any comments or anything you think we should know about your experience of taking part in this study. (optional)**

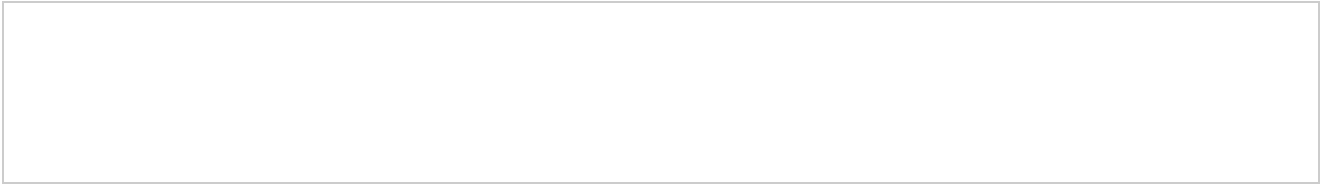

Survey Powered By [Qualtrics](#)
